# Supplementary material for: Combined Skin and Muscle DNA Priming Provides Enhanced Humoral Responses to a Human Immunodeficency Virus Type 1 Clade C Envelope Vaccine
Source: PubMed Central journal article supplement (PMC6214652; doi:10.1089/hum.2018.075), 2018-10-17
Supplement: Supp_Fig1.pdf [file Supp_Fig1.pdf]

## Supplementary Data

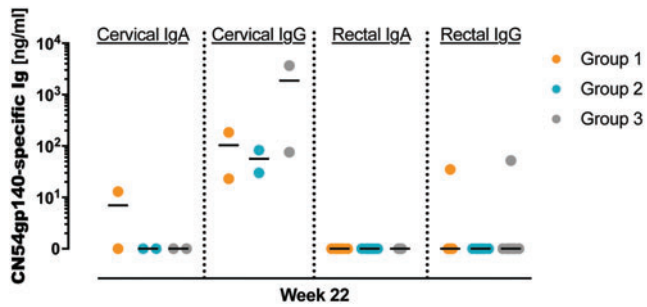

**Supplementary Figure S1.** Antigen-specific humoral responses in human mucosal secretions following DNA prime-boost vaccination regimens. Individual IgG and IgA responses within cervical and rectal secretions are shown (ng/mL) for participants post protein boost (week 22), the primary endpoint. i.d.<sub>EP</sub> + i.m. (orange, group 1), i.d. + i.m.<sub>EP</sub> (light blue, group 2), and i.d.<sub>EP</sub> + i.m.<sub>EP</sub> (gray, group 3). Bars represent median points.
