# Supplementary material for: Combined Skin and Muscle DNA Priming Provides Enhanced Humoral Responses to a Human Immunodeficency Virus Type 1 Clade C Envelope Vaccine
Source: PubMed Central journal article supplement (PMC6214652; doi:10.1089/hum.2018.075), 2018-10-17
Supplement: Supp_Fig2.pdf [file Supp_Fig2.pdf]

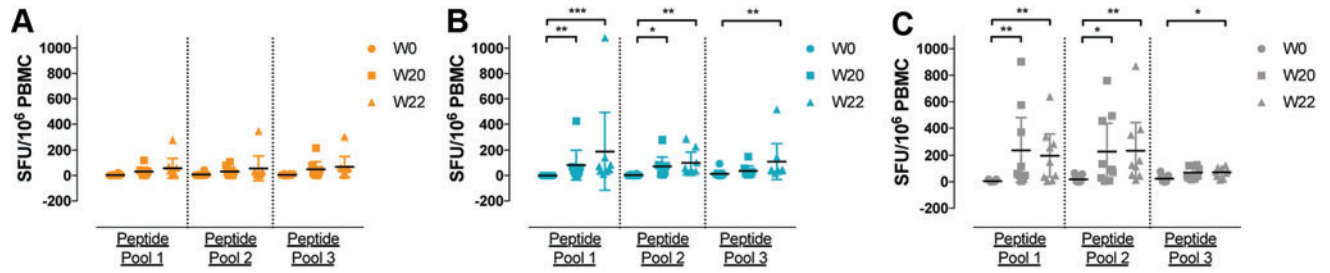

**Supplementary Figure S2.** T-cell IFN- $\gamma$  ELISpot responses to the individual CN54 peptide pools at baseline (week 0, *circles*), following DNA priming (week 20, *squares*) and protein boost (week 22, *triangles*), the primary endpoint. i.d.<sub>EP</sub> + i.m. (*orange*, group 1) (**A**), i.d. + i.m.<sub>EP</sub> (*light blue*, group 2) (**B**), or i.d.<sub>EP</sub> + i.m.<sub>EP</sub> (*gray*, group 3) (**C**). All responses are expressed as spot-forming units per million PBMC, with background subtracted (SFU/10<sup>6</sup> PBMC). Bars represent mean  $\pm$  95% CI. Statistical analysis was performed using Kruskal–Wallis Test with Dunn’s correction for multiple comparisons.
