# Supplementary material for: Combined Skin and Muscle DNA Priming Provides Enhanced Humoral Responses to a Human Immunodeficency Virus Type 1 Clade C Envelope Vaccine
Source: PubMed Central journal article supplement (PMC6214652; doi:10.1089/hum.2018.075), 2018-10-17
Supplement: Supp_Fig3.pdf [file Supp_Fig3.pdf]

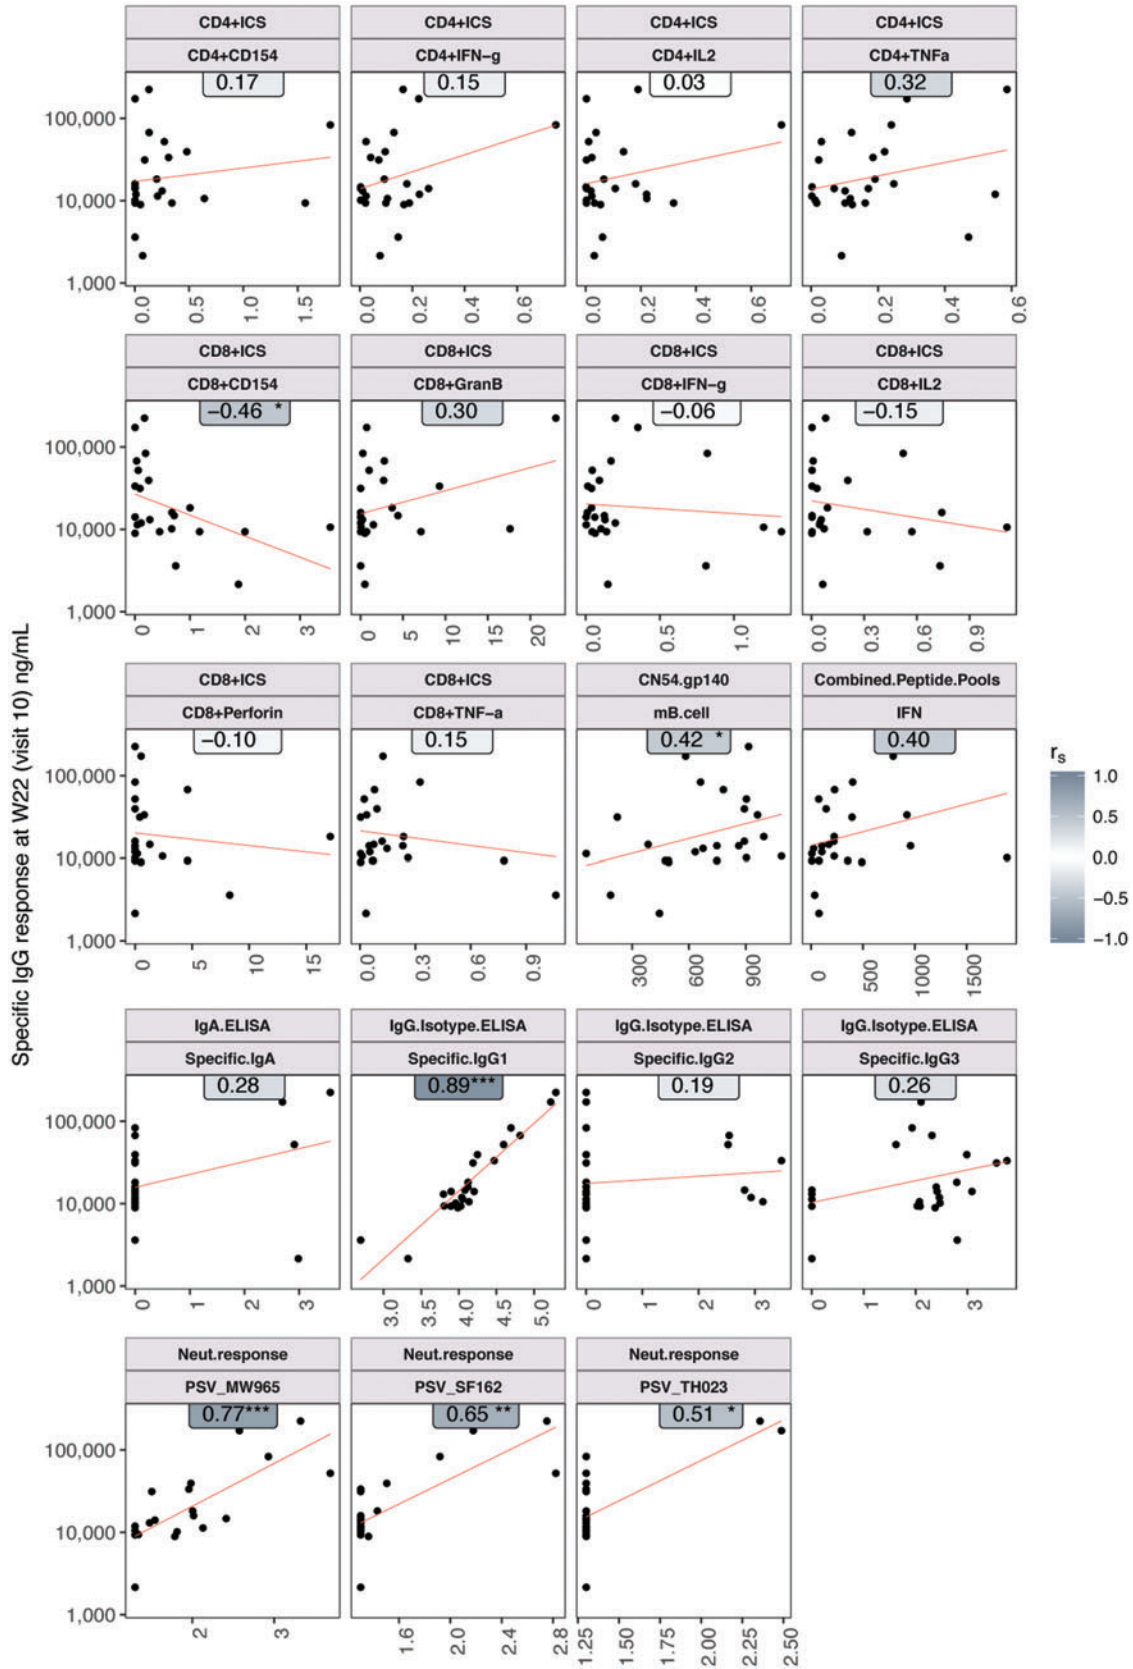

**Supplementary Figure S3.** Correlation analysis of antigen-specific serum IgG antibody responses at week 22, primary endpoint, plotted against CD4 and CD8 ICS functions, memory B-cell ELISpot, IFN- $\gamma$  ELISpot, isotype ELISA, and neutralization assays, as shown in the scatter plots. Correlations were calculated by Spearman's rank correlation coefficient ( $r_s$ ) and shown in boxes. The box colors reflect degree of correlation. The significance of the correlations is represented by asterisks: \* $p < 0.05$ ; \*\* $p < 0.01$ ; \*\*\* $p < 0.001$ .
