# Supplementary material for: Combined Skin and Muscle DNA Priming Provides Enhanced Humoral Responses to a Human Immunodeficency Virus Type 1 Clade C Envelope Vaccine
Source: PubMed Central journal article supplement (PMC6214652; doi:10.1089/hum.2018.075), 2018-10-17
Supplement: Supp_Fig4.pdf [file Supp_Fig4.pdf]

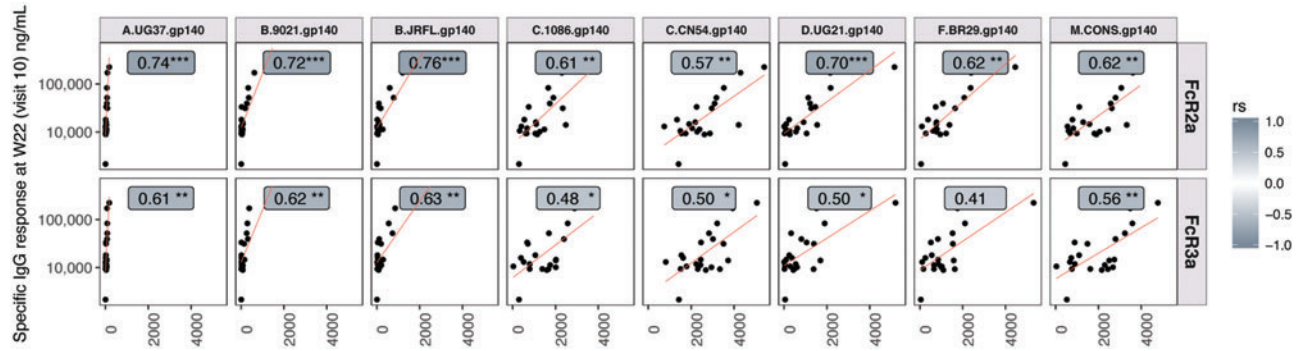

**Supplementary Figure S4.** Correlation analysis of antigen-specific serum IgG antibody responses at week 22, primary endpoint plotted against Fc $\gamma$ R (2a/IIa and 3a/IIIa) dimer assay data, as shown in the scatter plots. Correlations were calculated by Spearman's rank correlation coefficient ( $r_s$ ) and shown in boxes. The box colors reflect degree of correlation. The significance of the correlations is represented by asterisks: \* $p < 0.05$ ; \*\* $p < 0.01$ ; and \*\*\* $p < 0.001$ .
