# Supplementary material for: Combined Skin and Muscle DNA Priming Provides Enhanced Humoral Responses to a Human Immunodeficency Virus Type 1 Clade C Envelope Vaccine
Source: PubMed Central journal article supplement (PMC6214652; doi:10.1089/hum.2018.075), 2018-10-17
Supplement: Supp_Table1.pdf [file Supp_Table1.pdf]

**Supplementary Table S1. Trial inclusion and exclusion criteria**

| <i>Inclusion criteria</i>                                                                                                                                                                                                                                                                                                                                                                                                                                                                                                      | <i>Exclusion criteria</i>                                                                                                                                                                                                                                                                                                                                                                                                                                                                                                                                                                                                                                    |
|--------------------------------------------------------------------------------------------------------------------------------------------------------------------------------------------------------------------------------------------------------------------------------------------------------------------------------------------------------------------------------------------------------------------------------------------------------------------------------------------------------------------------------|--------------------------------------------------------------------------------------------------------------------------------------------------------------------------------------------------------------------------------------------------------------------------------------------------------------------------------------------------------------------------------------------------------------------------------------------------------------------------------------------------------------------------------------------------------------------------------------------------------------------------------------------------------------|
| Men and women aged between 18 and 50 years inclusive on the day of screening                                                                                                                                                                                                                                                                                                                                                                                                                                                   | Pregnant or lactating                                                                                                                                                                                                                                                                                                                                                                                                                                                                                                                                                                                                                                        |
| Body mass index between 18 and 30 kg/m <sup>2</sup> inclusive                                                                                                                                                                                                                                                                                                                                                                                                                                                                  | Skin-fold measurement of upper thigh >40 mm                                                                                                                                                                                                                                                                                                                                                                                                                                                                                                                                                                                                                  |
| Willing and able to give informed written consent                                                                                                                                                                                                                                                                                                                                                                                                                                                                              | Unable to read and speak English to a fluency level adequate for the full comprehension of procedures required in participation and consent, or unlikely to comply with the protocol                                                                                                                                                                                                                                                                                                                                                                                                                                                                         |
| At low risk of HIV and willing to remain so for the duration of study defined as:                                                                                                                                                                                                                                                                                                                                                                                                                                              | Clinically relevant abnormality on history or examination including:                                                                                                                                                                                                                                                                                                                                                                                                                                                                                                                                                                                         |
| <ul style="list-style-type: none"><li>• No history of injecting drug use in last 10 years</li><li>• No gonorrhoea or syphilis infection in last 6 months</li><li>• No "high-risk" partner (<i>e.g.</i>, IDU, HIV positive) currently or in last 6 months</li><li>• No unprotected anal intercourse in last 6 months outside of relationship with regular HIV-negative partner</li><li>• No unprotected vaginal intercourse in last 6 months outside of relationship with regular known/presumed HIV-negative partner</li></ul> | <ul style="list-style-type: none"><li>• History of grand-mal epilepsy, seizure disorder, or any history of prior seizure</li><li>• History of cardiac arrhythmia or palpitations</li><li>• History of syncope or fainting episodes within 1 year of enrolment</li><li>• Known hypersensitivity to any of the components in the vaccines or severe or multiple allergies to drugs or pharmaceutical agents</li><li>• Treatment with immunosuppressives in last 3 months (oral, inhaled, nasal, or injected)</li><li>• Surgical or traumatic metal implants at the sites of administration</li><li>• Current use of an electronic stimulation device</li></ul> |
| If heterosexually active female capable of becoming pregnant, must (in addition to using male condoms) agree to use hormonal contraception or abstain from 14 days before the first vaccination until 4 months after the last                                                                                                                                                                                                                                                                                                  | Women using an intrauterine device for contraception or with a past history of toxic shock syndrome                                                                                                                                                                                                                                                                                                                                                                                                                                                                                                                                                          |
| If heterosexually active male, must agree to use condoms from 14 days prior to the first vaccination until 4 months after the last                                                                                                                                                                                                                                                                                                                                                                                             |                                                                                                                                                                                                                                                                                                                                                                                                                                                                                                                                                                                                                                                              |
| Agree to abstain from blood donation for 3 months after the end of trial or longer if necessary                                                                                                                                                                                                                                                                                                                                                                                                                                | HIV-1 or -2 positive or indeterminate, HepBsAg-positive, HepC Ab-positive, or active syphilis                                                                                                                                                                                                                                                                                                                                                                                                                                                                                                                                                                |
| Available for follow-up for around 12 months from screening                                                                                                                                                                                                                                                                                                                                                                                                                                                                    | Grade 1 or above abnormal laboratory parameters (including conjugated hyperbilirubinemia)                                                                                                                                                                                                                                                                                                                                                                                                                                                                                                                                                                    |
| Willing to undergo HIV test and screen for genital infection screen                                                                                                                                                                                                                                                                                                                                                                                                                                                            | Previous severe reaction to vaccination or receipt of live attenuation vaccine in last 60 days or any other vaccine within 14 days of enrolment                                                                                                                                                                                                                                                                                                                                                                                                                                                                                                              |
| Registered with a GP for at least the past 3 months                                                                                                                                                                                                                                                                                                                                                                                                                                                                            | Receipt of an experimental vaccine containing HIV envelope components at any time in the past, or completion of another trial of a medicinal product within 30 days of enrolment                                                                                                                                                                                                                                                                                                                                                                                                                                                                             |
| Entered and clearance obtained from the Over-volunteering Prevention System database                                                                                                                                                                                                                                                                                                                                                                                                                                           | Receipt of blood products or immunoglobulin within 4 months of screening                                                                                                                                                                                                                                                                                                                                                                                                                                                                                                                                                                                     |
