# Supplementary material for: Combined Skin and Muscle DNA Priming Provides Enhanced Humoral Responses to a Human Immunodeficency Virus Type 1 Clade C Envelope Vaccine
Source: PubMed Central journal article supplement (PMC6214652; doi:10.1089/hum.2018.075), 2018-10-17
Supplement: Supp_Table2.pdf [file Supp_Table2.pdf]

**Supplementary Table S2. Demographic characteristics of randomized participants (N=24)**

|                          | <i>i.d./EP (n=8)</i> | <i>i.m./EP (n=8)</i> | <i>i.m./i.d./EP (n=8)</i> | <i>All (N=24)</i> |
|--------------------------|----------------------|----------------------|---------------------------|-------------------|
| Age (years)              | 31 (25–34)           | 27 (23–43)           | 22 (21–47)                | 27 (22–43)        |
| Sex (male)               | 6 (75%)              | 6 (75%)              | 6 (75%)                   | 18 (75%)          |
| Ethnicity                |                      |                      |                           |                   |
| White British            | 6                    | 5                    | 6                         | 17                |
| White other              | 1                    | 0                    | 2                         | 3                 |
| Other                    | 1                    | 3                    | 0                         | 4                 |
| Weight (kg)              | 82 (76–85)           | 62 (57–75)           | 73 (67–83)                | 75 (66–83)        |
| BMI (kg/m <sup>2</sup> ) | 24 (23–26)           | 21 (20–24)           | 25 (23–27)                | 24 (21–25)        |

Data shown are number (%) or median (interquartile range).
