# Supplementary material for: Combined Skin and Muscle DNA Priming Provides Enhanced Humoral Responses to a Human Immunodeficency Virus Type 1 Clade C Envelope Vaccine
Source: PubMed Central journal article supplement (PMC6214652; doi:10.1089/hum.2018.075), 2018-10-17
Supplement: Supp_Table3.pdf [file Supp_Table3.pdf]

**Supplementary Table S3. Demographic characteristics of non-randomized participants**

|               | <i>i.d./EP (n = 1)</i> | <i>i.m./EP (n = 0)</i> | <i>i.m./i.d./EP (n = 3)</i> | <i>All (N = 4)</i> |
|---------------|------------------------|------------------------|-----------------------------|--------------------|
| Age (years)   | 23                     |                        | 35 (27,48)                  | 31 (27,35)         |
| Sex (male)    | 1 (100%)               | 0                      | 2 (67%)                     | 3 (75%)            |
| Ethnicity     |                        |                        |                             |                    |
| White British | 1                      |                        | 1                           | 2                  |
| White other   |                        |                        | 1                           | 1                  |
| Other         |                        |                        | 1                           | 1                  |
