# Supplementary material for: Combined Skin and Muscle DNA Priming Provides Enhanced Humoral Responses to a Human Immunodeficency Virus Type 1 Clade C Envelope Vaccine
Source: PubMed Central journal article supplement (PMC6214652; doi:10.1089/hum.2018.075), 2018-10-17
Supplement: Supp_Table4.pdf [file Supp_Table4.pdf]

**Supplementary Table S4.** Summary of solicited local, systemic, or laboratory adverse events, any event leading to treatment discontinuation, and any unsolicited adverse event starting within 7 days of immunization

|                            | <i>i.d./EP</i><br>( <i>n</i> = 8) | <i>i.m./EP</i><br>( <i>n</i> = 8) | <i>i.m./i.d./EP</i><br>( <i>n</i> = 8) | <i>Total</i><br>( <i>N</i> = 24) |
|----------------------------|-----------------------------------|-----------------------------------|----------------------------------------|----------------------------------|
| Participants with ≥1 event | 7 (88%)                           | 8 (100%)                          | 8 (100%)                               | 23 (96%)                         |
| Events per participant     |                                   |                                   |                                        |                                  |
| 0                          | 1                                 | 0                                 | 0                                      | 1                                |
| 1–4                        | 0                                 | 0                                 | 1                                      | 1                                |
| 5–9                        | 1                                 | 1                                 | 1                                      | 3                                |
| 10–19                      | 3                                 | 6                                 | 3                                      | 12                               |
| ≥20                        | 3                                 | 1                                 | 3                                      | 7                                |
| Total number of events     | 120 (100%)                        | 115 (100%)                        | 130 (100%)                             | 365 (100%)                       |
| Type of event              |                                   |                                   |                                        |                                  |
| Solicited local            | 80 (67%)                          | 91 (79%)                          | 92 (71%)                               | 263 (72%)                        |
| Solicited systemic         | 25 (21%)                          | 13 (11%)                          | 18 (14%)                               | 56 (15%)                         |
| Systemic laboratory        | 4 (3%)                            | 7 (6%)                            | 12 (9%)                                | 23 (6%)                          |
| Unsolicited                | 11 (9%)                           | 4 (3%)                            | 8 (6%)                                 | 23 (6%)                          |
| Grade of event             |                                   |                                   |                                        |                                  |
| 1                          | 112 (93%)                         | 104 (90%)                         | 119 (92%)                              | 335 (92%)                        |
| 2                          | 7 (6%)                            | 10 (9%)                           | 11 (8%)                                | 28 (8%)                          |
| 3                          | 1 <sup>a</sup> (1%)               | 1 <sup>b</sup> (1%)               | 0 (0%)                                 | 2 (1%)                           |
| 4                          | 0 (0%)                            | 0 (0%)                            | 0 (0%)                                 | 0 (0%)                           |
| Relationship to vaccine    |                                   |                                   |                                        |                                  |
| Definite                   | 61 (80%)                          | 68 (93%)                          | 64 (81%)                               | 193 (85%)                        |
| Probable                   | 3 (4%)                            | 2 (3%)                            | 2 (3%)                                 | 7 (3%)                           |
| Possible                   | 3 (4%)                            | 0 (0%)                            | 4 (5%)                                 | 7 (3%)                           |
| Unlikely                   | 4 (5%)                            | 0 (0%)                            | 1 (1%)                                 | 5 (2%)                           |
| None                       | 5 (7%)                            | 3 (4%)                            | 8 (10%)                                | 16 (7%)                          |
| Missing <sup>c</sup>       | 44                                | 42                                | 51                                     | 137                              |

No safety events occurred that led to discontinuation of vaccine.

<sup>a</sup>Arm pain.

<sup>b</sup>Elevated aspartate transaminase.

<sup>c</sup>Relatedness not recorded for solicited events collected on diary cards.
