# Supplementary material for: Combined Skin and Muscle DNA Priming Provides Enhanced Humoral Responses to a Human Immunodeficency Virus Type 1 Clade C Envelope Vaccine
Source: PubMed Central journal article supplement (PMC6214652; doi:10.1089/hum.2018.075), 2018-10-17
Supplement: Supp_Table5.pdf [file Supp_Table5.pdf]

**Supplementary Table S5. Local solicited adverse events—arm**

| Symptom           | Maximum grade | i.d./EP             |                     |                     |                     | i.m./EP             |                     |                     |                     | i.m./i.d./EP        |                     |                     |                     |
|-------------------|---------------|---------------------|---------------------|---------------------|---------------------|---------------------|---------------------|---------------------|---------------------|---------------------|---------------------|---------------------|---------------------|
|                   |               | 1, n=8 <sup>a</sup> | 2, n=7 <sup>a</sup> | 3, n=7 <sup>a</sup> | 4, n=7 <sup>a</sup> | 1, n=8 <sup>a</sup> | 2, n=8 <sup>a</sup> | 3, n=8 <sup>a</sup> | 4, n=8 <sup>a</sup> | 1, n=8 <sup>a</sup> | 2, n=7 <sup>a</sup> | 3, n=7 <sup>a</sup> | 4, n=6 <sup>a</sup> |
| Discomfort        | 1             | 6                   | 5                   | 5                   | 6                   | 1                   | 2                   | 1                   | 4                   | 2                   | 3                   | 2                   | 6                   |
|                   | 2             | 0                   | 0                   | 0                   | 0                   | 0                   | 0                   | 0                   | 1                   | 0                   | 0                   | 0                   | 0                   |
|                   | 3             | 0                   | 0                   | 1                   | 0                   | 0                   | 0                   | 0                   | 0                   | 0                   | 0                   | 0                   | 0                   |
|                   | 4             | 0                   | 0                   | 0                   | 0                   | 0                   | 0                   | 0                   | 0                   | 0                   | 0                   | 0                   | 0                   |
| Redness           | 1             | 3                   | 4                   | 4                   | 6                   | 4                   | 3                   | 4                   | 7                   | 3                   | 4                   | 4                   | 6                   |
|                   | 2             | 0                   | 0                   | 0                   | 0                   | 0                   | 0                   | 0                   | 0                   | 0                   | 0                   | 0                   | 0                   |
|                   | 3             | 0                   | 0                   | 0                   | 0                   | 0                   | 0                   | 0                   | 0                   | 0                   | 0                   | 0                   | 0                   |
|                   | 4             | 0                   | 0                   | 0                   | 0                   | 0                   | 0                   | 0                   | 0                   | 0                   | 0                   | 0                   | 0                   |
| Swelling (soft)   | 1             | 1                   | 0                   | 2                   | 2                   | 1                   | 1                   | 3                   | 0                   | 0                   | 2                   | 1                   | 2                   |
|                   | 2             | 0                   | 0                   | 0                   | 0                   | 0                   | 0                   | 0                   | 0                   | 0                   | 0                   | 0                   | 0                   |
|                   | 3             | 0                   | 0                   | 0                   | 0                   | 0                   | 0                   | 0                   | 0                   | 0                   | 0                   | 0                   | 0                   |
|                   | 4             | 0                   | 0                   | 0                   | 0                   | 0                   | 0                   | 0                   | 0                   | 0                   | 0                   | 0                   | 0                   |
| Induration (hard) | 1             | 2                   | 1                   | 2                   | 3                   | 2                   | 2                   | 2                   | 6                   | 2                   | 3                   | 2                   | 5                   |
|                   | 2             | 0                   | 0                   | 0                   | 1                   | 0                   | 0                   | 0                   | 0                   | 0                   | 0                   | 0                   | 0                   |
|                   | 3             | 0                   | 0                   | 0                   | 0                   | 0                   | 0                   | 0                   | 0                   | 0                   | 0                   | 0                   | 0                   |
|                   | 4             | 0                   | 0                   | 0                   | 0                   | 0                   | 0                   | 0                   | 0                   | 0                   | 0                   | 0                   | 0                   |
| Blisters          | 1             | 4                   | 2                   | 2                   | 3                   | 4                   | 8                   | 4                   | 6                   | 2                   | 1                   | 2                   | 3                   |
|                   | 2             | 0                   | 0                   | 0                   | 3                   | 3                   | 0                   | 0                   | 2                   | 0                   | 2                   | 2                   | 3                   |
|                   | 3             | 0                   | 0                   | 0                   | 0                   | 0                   | 0                   | 0                   | 0                   | 0                   | 0                   | 0                   | 0                   |
|                   | 4             | 0                   | 0                   | 0                   | 0                   | 0                   | 0                   | 0                   | 0                   | 0                   | 0                   | 0                   | 0                   |

<sup>a</sup>Vaccination number, n=number at risk.
